# Supplementary material for: Broadly tunable graphene plasmons using an ion-gel top gate with low control voltage
Source: Royal Society of Chemistry journal article supplement (doi:10.1039/c5nr05175d), 2015-01-01
Supplement: c5nr05175d1.pdf [file c5nr05175d1.pdf]

## Supplementary Information

### Broadly Tunable Graphene Plasmons Using an Ion-gel Top Gate with Low Control Voltage

Hai Hu,<sup>a</sup> Feng Zhai,<sup>b</sup> Debo Hu,<sup>a</sup> Zhenjun Li,<sup>a</sup> Bing Bai,<sup>a</sup> Xiaoxia Yang,<sup>\*a</sup> and Qing Dai<sup>\*a</sup>

a. National Center for Nanoscience and technology, Beijing 100190, China.

b. Department of Physics, Zhejiang Normal University, Jinhua 321004, China.

†Corresponding E-mail: [daiq@nanoctr.cn](mailto:daiq@nanoctr.cn), [yangxx@nanoctr.cn](mailto:yangxx@nanoctr.cn);

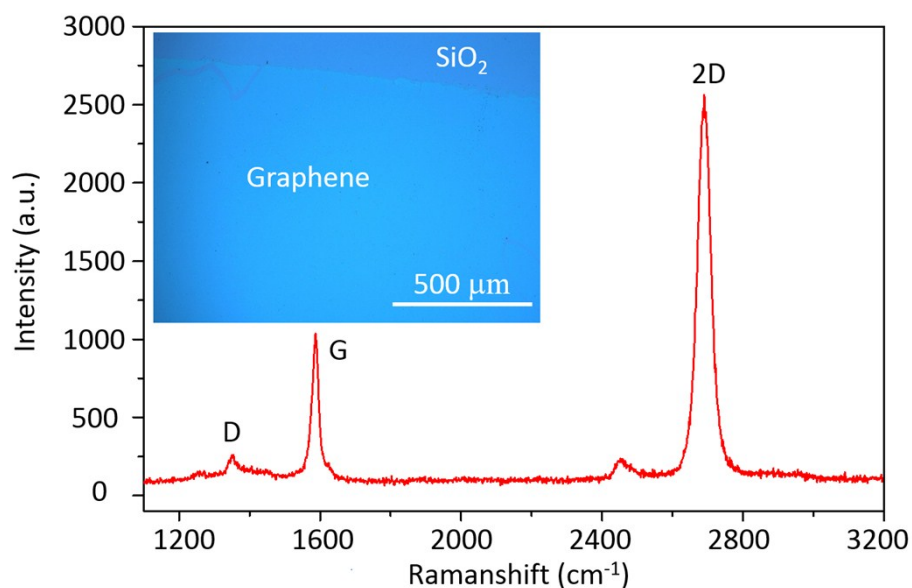

**Figure S1.** Raman spectrum of a CVD-grown graphene sheet on 300 nm SiO<sub>2</sub>/ Si substrate. Inset: Optical micrograph of the graphene sheet.

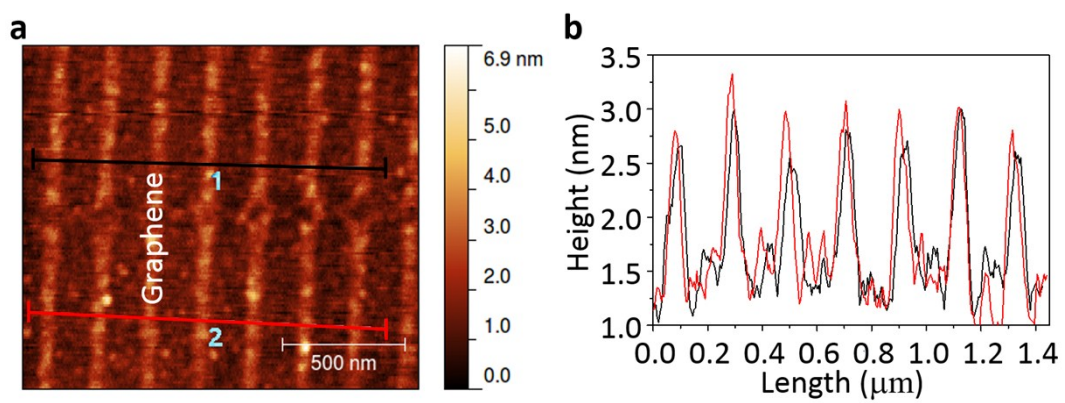

**Figure S2.** (a) AFM image of a graphene nanoribbon array with ribbon width of  $\sim 65$  nm. (b) Line-scan profile of the image shown in (a) corresponding to the black and red line, respectively. The graphene nanoribbons have a uniform thickness of about 2 nm.

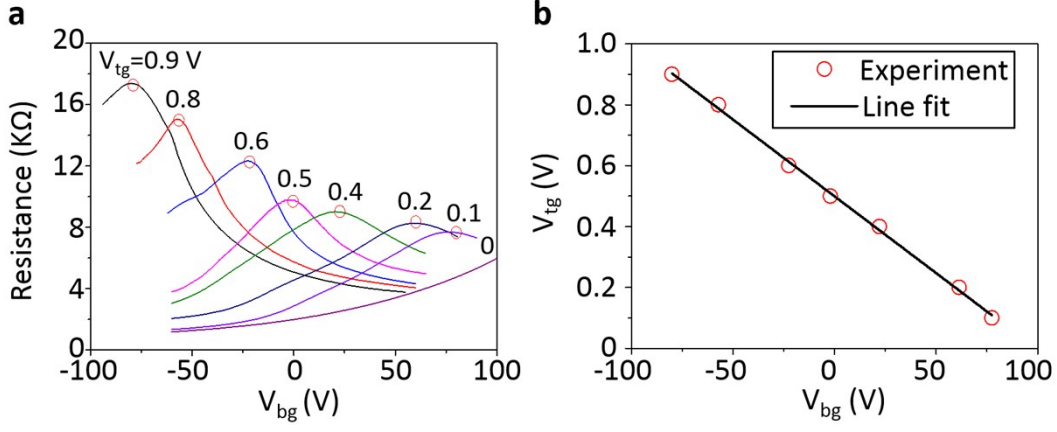

**Figure S3.** (a) Resistance as a function of  $V_{bg}$  at different fixed  $V_{tg}$ . (b) The linear relation between  $V_{tg}$  and  $V_{bg}$  that results at graphene CNPs. Red circles are experimental data and they can be fitted with the black line.

When graphene channel is simultaneously controlled by the top-gate and back-gate, the shift in the back-gate voltage at CNP ( $V_{bg,CNP}$ ) should be linearly dependent on the change of applied top-gate voltage ( $V_{tg}$ ). Figure S3 a shows the electrical resistance of graphene as a function of back-gate voltage ( $V_{bg}$ ) at different fixed  $V_{tg}$ . We extract the values of  $V_{bg,CNP}$  and plot them as function of related  $V_{tg}$ , which exhibits a linear relation, as shown in figure S3b. The slope of the  $V_{bg,CNP}$ - $V_{tg}$  line is -0.005, which is determined by the ratio between the capacitances (unit area) of ion-gel dielectric top-gate and  $SiO_2$  dielectric back-gate, that is,  $\frac{C_{tg}}{C_{bg}} = -\frac{\Delta V_{bg,CNP}}{\Delta V_{tg}}$ . Substituting the  $SiO_2$  capacitance ( $0.0121 \mu Fcm^{-2}$ ) and the slope into this formula, we can derive the top-gate capacitance as  $2.42 \mu Fcm^{-2}$ . Based on the calculated  $SiO_2$  back-gate and ion-gel top-gate capacitance, we can get:

$$V_{tg} - V_{CNP} = 1.283 * 10^{-7} \sqrt{n} + 7.146 * 10^{-14} n \quad (1)$$

$$V_{bg} - V_{CNP} = 1.283 * 10^{-7} \sqrt{n} + 1.324 * 10^{-11} n \quad (2)$$

$$V_{tg} - V_{CNP} = E_F + 4.05 E_F^2 \quad (3)$$

$$V_{bg} - V_{CNP} = E_F + 810 E_F^2 \quad (4)$$

Where  $n$  is in units of  $10^{13} cm^{-2}$  and  $E_F$  is in units of eV.  $\epsilon$  is the average of dielectric environment and for graphene sandwiched between two dielectric slabs with  $\epsilon_1$  and  $\epsilon_2$ ,  $\epsilon = 1/2 \times (\epsilon_1 + \epsilon_2)$ . Therefore, the resonance frequency are still different, while there are

fixed wave vector and Fermi level of graphene nanoribbons.

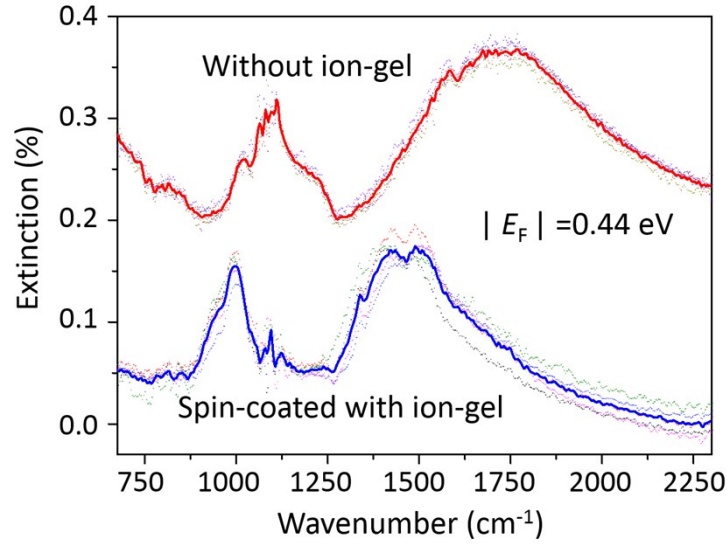

**Figure S4.** The extinction spectra taken from the same graphene nanoribbon array with (blue line) and without (red line) ion-gel film. The  $E_F$  of both cases are controlled to be the same by the same back gate. The measurements are both repeated 5 times and (dotted lines) the solid lines are the averages of the individual measurements.

Figure S4 shows extinction spectra of a same graphene nanoribbons with and without spin-coating a thin film of ion-gel. In both cases, the Fermi levels are fixed to be 0.44 eV by SiO<sub>2</sub> back gate and all measurements are repeated 5 times. We can obviously see that the GP frequency (1452 cm<sup>-1</sup>) in the blue line (spin-coated with ion-gel) is 274 cm<sup>-1</sup> less than that in the red line (without ion-gel film). This difference comes from the plasmonic frequency scales like  $\epsilon^{-1/2}$ , and the environmental dielectric constant  $\epsilon_{\text{eff}}$  of graphene changed. For air/graphene/SiO<sub>2</sub> structure,  $\epsilon_{\text{eff}}$  is 2.45 while  $\epsilon_{\text{eff}}$  equal to 4.67 for ion-gel/graphene/SiO<sub>2</sub>.

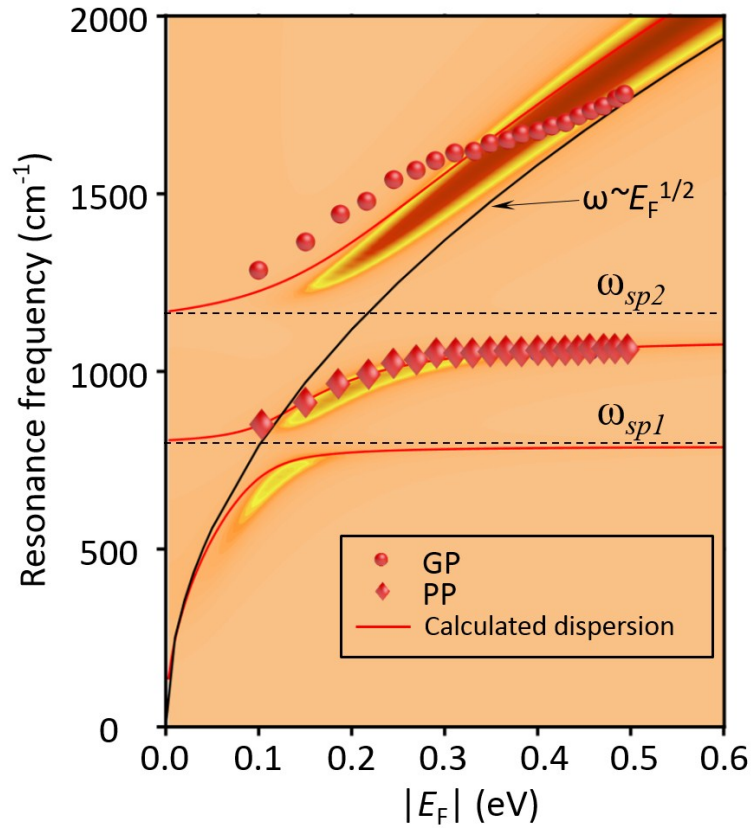

**Figure S5.** Calculated relation between plasmon resonance frequencies on Fermi levels controlled by SiO<sub>2</sub> back gate. The experimental resonance frequencies of PP and GP peaks extracted from Figure 2b in the main text are also plotted.

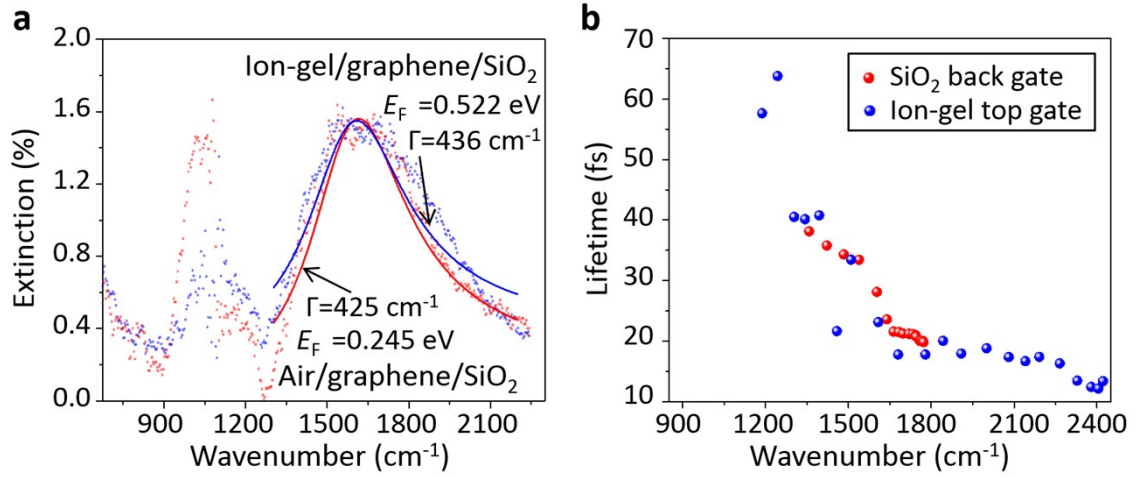

**Figure S6.** (a) Comparison between extinction spectra with the same resonance frequencies taken from the same graphene/SiO<sub>2</sub> device before (red dots) and after (blue dots) coating with an ion-gel thin film. The solid lines are the fitting curves in Fano model to extract the linewidth of resonance peaks. (b) The lifetime of the GP peaks extracted from a same graphene device with and without coating ion-gel dielectric as a function of resonance frequencies.

In figure S6a, we plot two extinction spectra taken from the graphene/SiO<sub>2</sub> device before and after ion-gel coating, which are chosen to have similar resonance frequencies. The linewidth  $\Gamma$ , corresponding to the damping rate of plasmon, of the device with ion-gel is obviously larger than that without ion-gel. We extracted the linewidth  $\Gamma$  of resonance peaks of all the extinction spectra obtained by using Fano model and then calculated their plasmon lifetime  $T$  via  $T = 2\hbar/\Gamma$ . In order to study the effect of ion-gel, we systematically compare the graphene plasmon lifetimes of graphene/SiO<sub>2</sub> device before (red lines) and after the coating of ion-gel top gate (blue lines), as shown in Figure S6b.
